# Supplementary material for: Genomic Features, Comparative Genomics, and Antimicrobial Susceptibility Patterns of Elizabethkingia bruuniana
Source: PubMed Central journal article supplement (PMC6381114; doi:10.1038/s41598-019-38998-6), 2019-02-19
Supplement: 41598_2019_38998_MOESM1_ESM.pdf [file 41598_2019_38998_MOESM1_ESM.pdf]

**Genomic Features, Comparative Genomics, and Antimicrobial  
Susceptibility Patterns of *Elizabethkingia brunniana***

Jiun-Nong Lin<sup>1,2,3</sup>, Chung-Hsu Lai<sup>1,2</sup>, Chih-Hui Yang<sup>4</sup>, Yi-Han Huang<sup>1</sup> & Hsi-Hsun  
Lin<sup>5,6</sup>

<sup>1</sup>School of Medicine, College of Medicine, I-Shou University, Kaohsiung, Taiwan

<sup>2</sup>Division of Infectious Diseases, Department of Internal Medicine, E-Da Hospital, I-Shou University, Kaohsiung, Taiwan

<sup>3</sup>Department of Critical Care Medicine, E-Da Hospital, I-Shou University, Kaohsiung, Taiwan

<sup>4</sup>Department of Biological Science and Technology, Meiho University, Pingtung, Taiwan

<sup>5</sup>General Clinical Research Center, Department of Medical Research, Taipei Veterans General Hospital, Taipei, Taiwan

<sup>6</sup>School of Medicine, National Yang-Ming University, Taipei, Taiwan

\*Corresponding author: Jiun-Nong Lin, MD, PhD

Division of Infectious Diseases, Department of Internal Medicine, E-Da Hospital, I-Shou University, Kaohsiung, Taiwan

No. 1, Yida Road, Jiaosu Village, Yanchao District, Kaohsiung, Taiwan

E-mail: jinoli@kmu.edu.tw

Tel: +886-7-6150011-251469

Fax: +886-7-615-0928

**Table S1.** Species, strains, and accession numbers of 16S rRNA used in this study

| <b>Species</b>                                                               | <b>Strain</b> | <b>GenBank accession number</b> |
|------------------------------------------------------------------------------|---------------|---------------------------------|
| <i>Elizabethkingia meningoseptica</i>                                        | ATCC 13253    | AJ704540                        |
| <i>Elizabethkingia anophelis</i>                                             | R26           | EF426425                        |
| <i>Elizabethkingia anophelis</i>                                             | EM361-97      | NZ_KV757122                     |
| <i>Elizabethkingia miricola</i>                                              | W3-B1         | AB071953                        |
| <i>Elizabethkingia bruuniana</i>                                             | G0146         | MH789419                        |
| <i>Elizabethkingia bruuniana</i>                                             | EM798-26      | CP023746                        |
| <i>Elizabethkingia ursingii</i>                                              | G4122         | MH789420                        |
| <i>Elizabethkingia occulta</i>                                               | G4070         | MH789418                        |
| <i>Chryseobacterium gleum</i>                                                | NBRC 15054    | AB680759                        |
| <i>Chryseobacterium indologenes</i>                                          | NBRC 14944    | AB517708                        |
| <i>Escherichia coli</i>                                                      | NBRC 102203   | AB681728                        |
| <i>Salmonella enterica</i> subsp. <i>enterica</i> serovar <i>Typhimurium</i> | LT2           | AE006468                        |
| <i>Pseudomonas aeruginosa</i>                                                | DSM 50071     | HE978271                        |
| <i>Klebsiella pneumoniae</i>                                                 | DSM 30104     | AJ233420                        |
| <i>Vibrio cholerae</i>                                                       | ATCC 14035    | EF032498                        |
| <i>Proteus hauseri</i> ( <i>Proteus vulgaris</i> )                           | NCTC 4175     | DQ885262                        |
| <i>Aeromonas caviae</i>                                                      | ATCC 15467    | X60409                          |
| <i>Stenotrophomonas maltophilia</i>                                          | CCUG 41684    | GU945534                        |
| <i>Acinetobacter calcoaceticus</i>                                           | ATCC 23055    | HE651903                        |
| <i>Acinetobacter baumannii</i>                                               | ATCC 19606    | HE651907                        |

|                             |           |          |
|-----------------------------|-----------|----------|
| <i>Enterobacter cloacae</i> | DSM 30054 | HE978272 |
|-----------------------------|-----------|----------|

**Table S2.** Information of whole-genome sequences used in this study

| <b>Organism/Name</b>                                                    | <b>Strain</b>            | <b>BioSample</b> | <b>BioProject</b> | <b>Assembly</b> | <b>Size (Mb)</b> | <b>GC%</b> | <b>Genes</b> | <b>Proteins</b> | <b>Level</b>    |
|-------------------------------------------------------------------------|--------------------------|------------------|-------------------|-----------------|------------------|------------|--------------|-----------------|-----------------|
| <i>Elizabethkingia miricola</i><br>( <i>Elizabethkingia bruuniana</i> ) | BM10                     | SAMN03398457     | PRJNA277897       | GCA_000955665.1 | 4.24252          | 35.7       | 3888         | 3728            | Complete Genome |
| <i>Elizabethkingia miricola</i><br>( <i>Elizabethkingia bruuniana</i> ) | EM798-26                 | SAMN07733282     | PRJNA412960       | GCA_002557775.1 | 4.39301          | 35.7       | 4029         | 3877            | Complete Genome |
| <i>Elizabethkingia miricola</i><br>( <i>Elizabethkingia bruuniana</i> ) | ATCC 33958               | SAMN02989770     | PRJNA259681       | GCA_000769445.1 | 4.57811          | 35.9       | 4308         | 4160            | Contig          |
| <i>Elizabethkingia miricola</i>                                         | EM_CHUV                  | SAMN03998138     | PRJNA293155       | GCA_001483145.1 | 4.28605          | 36.0726    | 3902         | 3806            | Contig          |
| <i>Elizabethkingia miricola</i>                                         | GTC_862<br>(type strain) | SAMD00016624     | PRJNA301708       | GCA_001675285.1 | 4.29381          | 35.8       | 4003         | 3899            | Contig          |
| <i>Elizabethkingia miricola</i>                                         | CSID_3000517120          | SAMN05254999     | PRJNA301708       | GCA_002023335.1 | 4.4291           | 35.9       | 4042         | 3947            | Contig          |
| <i>Elizabethkingia miricola</i>                                         | G4121                    | SAMN05281843     | PRJNA301708       | GCA_002023475.1 | 4.42197          | 35.9       | 4104         | 4010            | Contig          |
| <i>Elizabethkingia miricola</i>                                         | CSID_3000516464          | SAMN05255998     | PRJNA301708       | GCA_002023515.1 | 4.18805          | 35.8       | 3853         | 3765            | Contig          |
| <i>Elizabethkingia miricola</i>                                         | CSID_3000516998          | SAMN05256599     | PRJNA301708       | GCA_002023575.1 | 4.36583          | 36         | 4073         | 3967            | Contig          |
| <i>Elizabethkingia miricola</i>                                         | G4074<br>(type strain)   | SAMN05277881     | PRJNA301708       | GCA_002023685.1 | 4.27041          | 35.9       | 3923         | 3828            | Contig          |
| <i>Elizabethkingia miricola</i>                                         | FL160902                 | SAMN07139315     | PRJNA387126       | GCA_002738605.1 | 4.21902          | 35.7       | -            | -               | Contig          |
| <i>Elizabethkingia miricola</i>                                         | KCTC 12492               | SAMEA4051575     | PRJEB13258        | GCA_900092045.1 | 4.29997          | 35.8       | 4005         | 3897            | Contig          |
| <i>Elizabethkingia miricola</i>                                         | LDVH-337.01              | SAMEA4026803     | PRJEB14302        | GCA_900157035.1 | 4.15085          | 35.9       | 3816         | 3676            | Contig          |
| <i>Elizabethkingia miricola</i>                                         | CIP111047                | SAMEA50780668    | PRJEB14302        | GCA_900157015.1 | 4.45145          | 35.9       | 4197         | 4098            | Scaffold        |

|                                                                           |                         |              |             |                 |         |       |      |      |                 |
|---------------------------------------------------------------------------|-------------------------|--------------|-------------|-----------------|---------|-------|------|------|-----------------|
| <i>Elizabethkingia</i> genomsp. 3<br>( <i>Elizabethkingia bruuniana</i> ) | G0146                   | SAMN05277827 | PRJNA326741 | GCA_002024805.1 | 4.43352 | 35.9  | 4127 | 4007 | Complete Genome |
| <i>Elizabethkingia</i> genomsp. 3<br>( <i>Elizabethkingia bruuniana</i> ) | G0146<br>(type strain)  | SAMN05277827 | PRJNA301708 | GCA_002023205.1 | 4.38585 | 35.8  | 4086 | 3981 | Contig          |
| <i>Elizabethkingia</i> genomsp. 3<br>( <i>Elizabethkingia bruuniana</i> ) | CSID_3000516589         | SAMN05256516 | PRJNA301708 | GCA_002023545.1 | 4.21084 | 35.8  | 3838 | 3750 | Contig          |
| <i>Elizabethkingia</i> genomsp. 3<br>( <i>Elizabethkingia bruuniana</i> ) | CSID_3015183685         | SAMN05277593 | PRJNA301708 | GCA_002023765.1 | 4.3224  | 35.8  | 3973 | 3882 | Contig          |
| <i>Elizabethkingia</i> genomsp. 3<br>( <i>Elizabethkingia bruuniana</i> ) | G0153                   | SAMN05277862 | PRJNA301708 | GCA_002023775.1 | 4.37908 | 35.8  | 4073 | 3965 | Contig          |
| <i>Elizabethkingia</i> genomsp. 3<br>( <i>Elizabethkingia bruuniana</i> ) | G4075                   | SAMN04254558 | PRJNA301708 | GCA_001521735.1 | 4.22977 | 35.8  | 3914 | 3817 | Scaffold        |
| <i>Elizabethkingia anophelis</i>                                          | R26<br>(type strain)    | SAMN02470677 | PRJNA178189 | GCA_000331815.1 | 4.03272 | 35.40 | 3746 | 3643 | Complete Genome |
| <i>Elizabethkingia meningoseptica</i>                                     | KC1913<br>(type strain) | SAMN04254555 | PRJNA301708 | GCA_001521755.1 | 3.85364 | 36.40 | 3462 | 3383 | Scaffold        |
| <i>Elizabethkingia</i> genomsp. 4<br>( <i>Elizabethkingia ursingii</i> )  | G4122<br>(type strain)  | SAMN04254563 | PRJNA301708 | GCA_001521765.1 | 4.3397  | 35.60 | 3984 | 3859 | Scaffold        |
| <i>Elizabethkingia</i> genomsp. 4<br>( <i>Elizabethkingia occulta</i> )   | G4070<br>(type strain)  | SAMN05277871 | PRJNA301708 | GCA_002023715.1 | 4.15401 | 35.60 | 3751 | 3645 | Contig          |

**Table S3.** Potential virulence factors predicted using the virulence factor database (VFDB)

| Gene id        | Identity | E value   | Subject id | Protein    | Gene description                                                                     |
|----------------|----------|-----------|------------|------------|--------------------------------------------------------------------------------------|
| 798_26GL000885 | 41.32    | 6.00E-94  | VFG0036    | LPS        | bplC - lipopolysaccharide biosynthesis protein                                       |
| 798_26GL000118 | 45.83    | 4.00E-68  | VFG0077    | ClpP       | clpP - ATP-dependent Clp protease proteolytic subunit                                |
| 798_26GL000516 | 35.49    | 4.00E-156 | VFG0079    | ClpC       | clpC - endopeptidase Clp ATP-binding chain C                                         |
| 798_26GL001947 | 32.82    | 2.00E-84  | VFG0116    | Alginate   | algB - two-component response regulator AlgB                                         |
| 798_26GL003849 | 31.4     | 1.00E-18  | VFG0119    | Alginate   | algR - alginate biosynthesis regulatory protein AlgR                                 |
| 798_26GL002789 | 30.79    | 1.00E-56  | VFG0122    | Alginate   | algD - GDP-mannose 6-dehydrogenase AlgD                                              |
| 798_26GL001525 | 33.16    | 1.00E-65  | VFG0130    | Alginate   | algI - alginate o-acetyltransferase AlgI                                             |
| 798_26GL003331 | 30.67    | 1.00E-28  | VFG0246    | LOS        | lgtF - beta-1,4-glucosyltransferase                                                  |
| 798_26GL003803 | 55.14    | 2.00E-45  | VFG0269    | Urease     | ureA - urease alpha subunit (ureA) (urea amidohydrolase)                             |
| 798_26GL003806 | 32.81    | 2.00E-27  | VFG0272    | Urease     | ureE - urease accessory protein (ureE)                                               |
| 798_26GL003808 | 64.14    | 1.00E-104 | VFG0274    | Urease     | ureG - urease accessory protein (ureG)                                               |
| 798_26GL002571 | 34.4     | 2.00E-70  | VFG0313    | LPS        | gluP - glucose/galactose transporter (gluP)                                          |
| 798_26GL002401 | 37.58    | 5.00E-33  | VFG0320    | LPS        | kdtB - lipopolysaccharide core biosynthesis protein (kdtB)                           |
| 798_26GL004066 | 31.69    | 3.00E-48  | VFG0344    | HitABC     | hitC - iron(III) ABC transporter, ATP-binding protein                                |
| 798_26GL001922 | 44.52    | 6.00E-160 | VFG0431    | Vi antigen | tviB - Vi polysaccharide biosynthesis protein, UDP-glucose/GDP-mannose dehydrogenase |
| 798_26GL001231 | 32.12    | 2.00E-21  | VFG0575    | MgtBC      | mgtC - Mg <sup>2+</sup> transport protein                                            |
| 798_26GL003027 | 36.93    | 9.00E-167 | VFG0619    | Aerobactin | iutA - receptor-like protein iutA [Shigella flexneri (serotype 2a) 301]              |
| 798_26GL001006 | 33.66    | 1.00E-76  | VFG0670    | LPS        | gtrB - bactoprenol glucosyl transferase                                              |
| 798_26GL002032 | 36.15    | 4.00E-62  | VFG0674    | SMase      | smcL - sphingomyelinase-c                                                            |

|                |       |           |         |                 |                                                                |
|----------------|-------|-----------|---------|-----------------|----------------------------------------------------------------|
| 798_26GL000335 | 32.18 | 2.00E-52  | VFG0679 | Capsule         | dep/capD - $\gamma$ -glutamyltranspeptidase                    |
| 798_26GL003341 | 30.89 | 9.00E-25  | VFG0869 | Dispersin       | aatC - AatC ATB binding protein of ABC transporter             |
| 798_26GL000890 | 31.07 | 6.00E-24  | VFG0869 | Dispersin       | aatC - AatC ATB binding protein of ABC transporter             |
| 798_26GL002348 | 36.26 | 1.00E-36  | VFG0869 | Dispersin       | aatC - AatC ATB binding protein of ABC transporter             |
| 798_26GL002829 | 30    | 5.00E-21  | VFG0872 | Type 1 fimbriae | fimE - Type 1 fimbriae Regulatory protein fimE                 |
| 798_26GL001929 | 32.34 | 9.00E-67  | VFG0916 | Chu             | chuS - Putative heme/hemoglobin transport protein              |
| 798_26GL001932 | 34.3  | 1.00E-59  | VFG0922 | Chu             | chuU - Putative permease of iron compound ABC transport system |
| 798_26GL000108 | 30.38 | 5.00E-21  | VFG0934 | Enterobactin    | entA - 2,3-dihydro-2,3-dihydroxybenzoate dehydrogenase         |
| 798_26GL003073 | 30.68 | 3.00E-35  | VFG0934 | Enterobactin    | entA - 2,3-dihydro-2,3-dihydroxybenzoate dehydrogenase         |
| 798_26GL001943 | 31.37 | 2.00E-32  | VFG1206 | FbpABC          | fbpC - iron(III) ABC transporter, ATP-binding protein          |
| 798_26GL000094 | 32.56 | 2.00E-92  | VFG1214 | Type IV pili    | pilR - two-component response regulator PilR                   |
| 798_26GL001361 | 37.93 | 2.00E-95  | VFG1214 | Type IV pili    | pilR - two-component response regulator PilR                   |
| 798_26GL002938 | 44.35 | 2.00E-67  | VFG1248 | Flagella        | fleQ - transcriptional regulator FleQ                          |
| 798_26GL002311 | 47.31 | 3.00E-113 | VFG1300 | Capsule         | cap8D - capsular polysaccharide synthesis enzyme Cap8D         |
| 798_26GL002308 | 57.18 | 4.00E-152 | VFG1301 | Capsule         | cap8E - capsular polysaccharide synthesis enzyme Cap8E         |
| 798_26GL003580 | 30.68 | 2.00E-10  | VFG1310 | Capsule         | cap8N - capsular polysaccharide synthesis enzyme Cap8N         |
| 798_26GL002302 | 31.86 | 5.00E-35  | VFG1343 | Capsule         | cpsN - glycosyl transferase CpsN(V)                            |
| 798_26GL003658 | 36.32 | 1.00E-34  | VFG1344 | Capsule         | cpsM - polysaccharide biosynthesis protein CpsM(V)             |
| 798_26GL000190 | 31.98 | 8.00E-38  | VFG1390 | MprAB           | mprA - hypothetical protein Rv0981                             |
| 798_26GL003363 | 32.44 | 2.00E-53  | VFG1390 | MprAB           | mprA - hypothetical protein Rv0981                             |
| 798_26GL001772 | 33.18 | 8.00E-52  | VFG1390 | MprAB           | mprA - hypothetical protein Rv0981                             |

|                |       |           |         |           |                                                |
|----------------|-------|-----------|---------|-----------|------------------------------------------------|
| 798_26GL001370 | 34.22 | 3.00E-42  | VFG1390 | MprAB     | mprA - hypothetical protein Rv0981             |
| 798_26GL001431 | 35.34 | 6.00E-60  | VFG1390 | MprAB     | mprA - hypothetical protein Rv0981             |
| 798_26GL000086 | 31.4  | 2.00E-21  | VFG1395 | MgtC      | mgtC - mgtC                                    |
| 798_26GL001791 | 36.16 | 6.00E-48  | VFG1395 | MgtC      | mgtC - mgtC                                    |
| 798_26GL001174 | 33.74 | 5.00E-29  | VFG1404 | AhpC      | ahpC - ahpC                                    |
| 798_26GL001165 | 35.5  | 6.00E-67  | VFG1405 | SigA      | sigA - sigA                                    |
| 798_26GL003523 | 50.47 | 9.00E-38  | VFG1416 | PanC/PanD | panD - panD                                    |
| 798_26GL002277 | 40.21 | 4.00E-47  | VFG1417 | PanC/PanD | panC - panC                                    |
| 798_26GL001915 | 30    | 2.00E-42  | VFG1444 | AslA      | aslA - putative arylsulfatase                  |
| 798_26GL001526 | 41.26 | 2.00E-36  | VFG1864 | Mip       | mip - macrophage infectivity potentiator (Mip) |
| 798_26GL000580 | 39.18 | 7.00E-49  | VFG1867 | SodB      | sodB - superoxide dismutase                    |
| 798_26GL001218 | 39.59 | 2.00E-55  | VFG1867 | SodB      | sodB - superoxide dismutase                    |
| 798_26GL002823 | 43.88 | 1.00E-61  | VFG1867 | SodB      | sodB - superoxide dismutase                    |
| 798_26GL001508 | 39.48 | 2.00E-83  | VFG1971 | Capsule   | kpsF - KpsF protein                            |
| 798_26GL001317 | 32.14 | 4.00E-18  | VFG2008 | Flagella  | motB - flagellar motor protein MotB            |
| 798_26GL003326 | 30.6  | 7.00E-28  | VFG2224 | LPS       | wbkA - mannosyltransferase                     |
| 798_26GL000886 | 40.84 | 1.00E-103 | VFG2361 | O-antigen | galE - UDP-glucose 4-epimerase                 |
| 798_26GL002328 | 45.62 | 7.00E-115 | VFG2364 | O-antigen | fcl - GDP-flucose synthetase                   |
| 798_26GL002327 | 58.61 | 5.00E-169 | VFG2365 | O-antigen | gmd - GDP-mannose 4,6-dehydratase              |



**Table S4.** Potential antibiotic resistance genes identified using the Antibiotic Resistance Genes Database (ARDB) BLAST Server

| <b>Gene id</b> | <b>Identity</b> | <b>E value</b> | <b>Subject id</b> | <b>Antibiotic Resistance</b> | <b>Description</b>                                                                                                                             |
|----------------|-----------------|----------------|-------------------|------------------------------|------------------------------------------------------------------------------------------------------------------------------------------------|
| 798_26GL001208 | 30              | 6.00E-39       | ardb_2322         | Bacitracin                   | ABC transporter system, bacitracin efflux pump.                                                                                                |
| 798_26GL001461 | 30              | 3.00E-24       | ardb_2858         | Bacitracin                   | --                                                                                                                                             |
| 798_26GL001650 | 30.13           | 6.00E-37       | ardb_115          | Vancomycin                   | VanE type vancomycin resistance operon genes, which can synthesize peptidoglycan with modified C-terminal D-Ala-D-Ala to D-alanine--D-serine.  |
| 798_26GL003067 | 30.46           | 3.00E-53       | ardb_2749         | Vancomycin                   | VanG type vancomycin resistance operon genes, which can synthesize peptidoglycan with modified C-terminal D-Ala-D-Ala to D-alanine--D-serine.  |
| 798_26GL002835 | 30.51           | 2.00E-33       | ardb_1732         | Vancomycin,<br>teicoplanin   | VanA type vancomycin resistance operon genes, which can synthesize peptidoglycan with modified C-terminal D-Ala-D-Ala to D-alanine--D-lactate. |
| 798_26GL000126 | 30.95           | 3.00E-34       | ardb_2452         | Sulfonamide                  | Sulfonamide-resistant dihydropteroate synthase, which cannot be inhibited by sulfonamide.                                                      |
| 798_26GL000603 | 31              | 9.00E-36       | ardb_2470         | Vancomycin,<br>teicoplanin   | VanA type vancomycin resistance operon genes, which can synthesize peptidoglycan with modified C-terminal D-Ala-D-Ala to D-alanine--D-lactate. |
| 798_26GL004049 | 31.09           | 9.00E-62       | ardb_2640         | Macrolide                    | Resistance-nodulation-cell division transporter system. Multidrug resistance efflux pump. Macrolide-specific efflux system.                    |
| 798_26GL000821 | 31.3            | 2.00E-62       | ardb_1951         | Chloramphenicol              | Major facilitator superfamily transporter,                                                                                                     |

|                |       |          |           |                            |                                                                                                                                                                                         |
|----------------|-------|----------|-----------|----------------------------|-----------------------------------------------------------------------------------------------------------------------------------------------------------------------------------------|
|                |       |          |           |                            | chloramphenicol efflux pump.                                                                                                                                                            |
| 798_26GL002854 | 31.36 | 1.00E-06 | ardb_2497 | Vancomycin,<br>teicoplanin | VanA type vancomycin resistance operon genes, which can synthesize peptidoglycan with modified C-terminal D-Ala-D-Ala to D-alanine--D-lactate.                                          |
| 798_26GL002400 | 31.76 | 3.00E-51 | ardb_2028 | Vancomycin                 | VanG type vancomycin resistance operon genes, which can synthesize peptidoglycan with modified C-terminal D-Ala-D-Ala to D-alanine--D-serine.                                           |
| 798_26GL003582 | 32    | 2.00E-27 | ardb_654  | Vancomycin                 | VanG type vancomycin resistance operon genes, which can synthesize peptidoglycan with modified C-terminal D-Ala-D-Ala to D-alanine--D-serine.                                           |
| 798_26GL000111 | 32.01 | 2.00E-53 | ardb_1853 | Bacitracin                 | ABC transporter system, bacitracin efflux pump.                                                                                                                                         |
| 798_26GL001431 | 32.63 | 2.00E-41 | ardb_115  | Vancomycin                 | VanE type vancomycin resistance operon genes, which can synthesize peptidoglycan with modified C-terminal D-Ala-D-Ala to D-alanine--D-serine.                                           |
| 798_26GL001118 | 32.82 | 7.00E-40 | ardb_1739 | Kasugamycin                | Specifically dimethylates two adjacent adenosines in the loop of a conserved hairpin near the 3'-end of 16S rRNA in the 30S particle. Its inactivation leads to kasugamycin resistance. |
| 798_26GL003751 | 32.98 | 5.00E-21 | ardb_2747 | Cephalosporin              | Class C beta-lactamase. This enzyme breaks the beta-lactam antibiotic ring open and deactivates the molecule's antibacterial properties.                                                |
| 798_26GL000656 | 34.05 | 2.00E-56 | ardb_2990 | Bacitracin                 | ABC transporter system, bacitracin efflux pump.                                                                                                                                         |

|                |       |          |           |                           |                                                                                                                                               |
|----------------|-------|----------|-----------|---------------------------|-----------------------------------------------------------------------------------------------------------------------------------------------|
| 798_26GL002404 | 34.15 | 3.00E-40 | ardb_13   | Trimethoprim              | Group A drug-insensitive dihydrofolate reductase, which cannot be inhibited by trimethoprim.                                                  |
| 798_26GL000620 | 34.26 | 1.00E-16 | ardb_1205 | Multiple antimicrobials   | Small Multidrug Resistance (SMR) protein family. Multidrug resistance efflux pump, which consists of two proteins.                            |
| 798_26GL001823 | 34.98 | 1.00E-49 | ardb_998  | Penicillin                | Class A beta-lactamase. This enzyme breaks the beta-lactam antibiotic ring open and deactivates the molecule's antibacterial properties.      |
| 798_26GL001370 | 35.14 | 1.00E-39 | ardb_1550 | Vancomycin                | VanB type vancomycin resistance operon genes, which can synthesize peptidoglycan with modified C-terminal D-Ala-D-Ala to D-alanine-D-lactate. |
| 798_26GL001069 | 35.47 | 3.00E-82 | ardb_1016 | Tetracycline              | Major facilitator superfamily transporter, tetracycline efflux pump.                                                                          |
| 798_26GL001517 | 36.11 | 1.00E-15 | ardb_1267 | Multiple antimicrobials   | Small Multidrug Resistance (SMR) protein family. Multidrug resistance efflux pump, which consists of two proteins.                            |
| 798_26GL000702 | 36.21 | 2.00E-72 | ardb_916  | Cephalosporin, penicillin | Class A beta-lactamase. This enzyme breaks the beta-lactam antibiotic ring open and deactivates the molecule's antibacterial properties.      |
| 798_26GL000324 | 38.98 | 1.00E-69 | ardb_916  | Cephalosporin, penicillin | Class A beta-lactamase. This enzyme breaks the beta-lactam antibiotic ring open and deactivates the molecule's antibacterial properties.      |

|                |       |           |           |                 |                                                                                                                                    |
|----------------|-------|-----------|-----------|-----------------|------------------------------------------------------------------------------------------------------------------------------------|
| 798_26GL001121 | 39.43 | 2.00E-67  | ardb_2724 | Bacitracin      | Undecaprenyl pyrophosphate phosphatase, which consists in the sequestration of undecaprenyl pyrophosphate.                         |
| 798_26GL000331 | 40    | 5.00E-29  | ardb_1787 | Aminoglycoside  | Multidrug resistance efflux pump.                                                                                                  |
| 798_26GL000052 | 55.35 | 8.00E-160 | ardb_2144 | Tetracycline    | NADP-requiring oxidoreductase, an enzyme that can modify tetracycline. Mechanism detail unknown.                                   |
| 798_26GL002831 | 63.41 | 3.00E-108 | ardb_2771 | Chloramphenicol | Group B chloramphenicol acetyltransferase, which can inactivate chloramphenicol. Also referred to as xenobiotic acetyltransferase. |
